# Supplementary material
Source: ML conference proceedings conference paper supplement (https://www.ecva.net/papers/eccv_2020/papers_ECCV/html/123460273_ECCV_2020_paper.php)
Supplement: Supplementary file 1 [file 123460273-supp.pdf]

# Supplementary Material for Conditional Convolutions for Instance Segmentation

Zhi Tian, Chunhua Shen, Hao Chen

The University of Adelaide, Australia

## 1 Experiments on Cityscapes

We also conduct experiments on the benchmark Cityscapes [1]. The benchmark has fine annotations for 2, 975 training, 500 validation, and 1, 525 testing images. Following Mask R-CNN [2], we only use the fine annotations to train the models. The results are reported on the Cityscapes `val` split. The training details are the same as that of Mask R-CNN on Cityscapes in `Detectron2` [3]. As shown in Table 1, CondInst outperforms Mask R-CNN by 0.4% AP on Cityscapes `val`.

Table 1: Results on Cityscapes `val` with ResNet-50-FPN.

| method     | AP          | AP <sub>50</sub> | person      | rider       | car         | truck       | bus         | train       | mcycle      | bicycle     |
|------------|-------------|------------------|-------------|-------------|-------------|-------------|-------------|-------------|-------------|-------------|
| Mask R-CNN | 36.5        | 62.2             | <b>35.0</b> | <b>28.8</b> | 53.0        | 34.3        | 57.0        | <b>37.5</b> | <b>22.3</b> | <b>23.8</b> |
| CondInst   | <b>36.9</b> | <b>63.2</b>      | <b>35.0</b> | 28.4        | <b>55.5</b> | <b>37.4</b> | <b>57.5</b> | 36.3        | 22.1        | 23.3        |

## 2 More Visualization Results

Here, we show more qualitative results in Fig. 1.

## References

1. Cordts, M., Omran, M., Ramos, S., Rehfeld, T., Enzweiler, M., Benenson, R., Franke, U., Roth, S., Schiele, B.: The cityscapes dataset for semantic urban scene understanding. In: Proc. of the IEEE Conference on Computer Vision and Pattern Recognition (CVPR) (2016)
2. He, K., Gkioxari, G., Dollár, P., Girshick, R.: Mask R-CNN. In: Proc. IEEE Int. Conf. Comp. Vis. pp. 2961–2969 (2017)
3. Wu, Y., Kirillov, A., Massa, F., Lo, W.Y., Girshick, R.: Detectron2. <https://github.com/facebookresearch/detectron2> (2019)

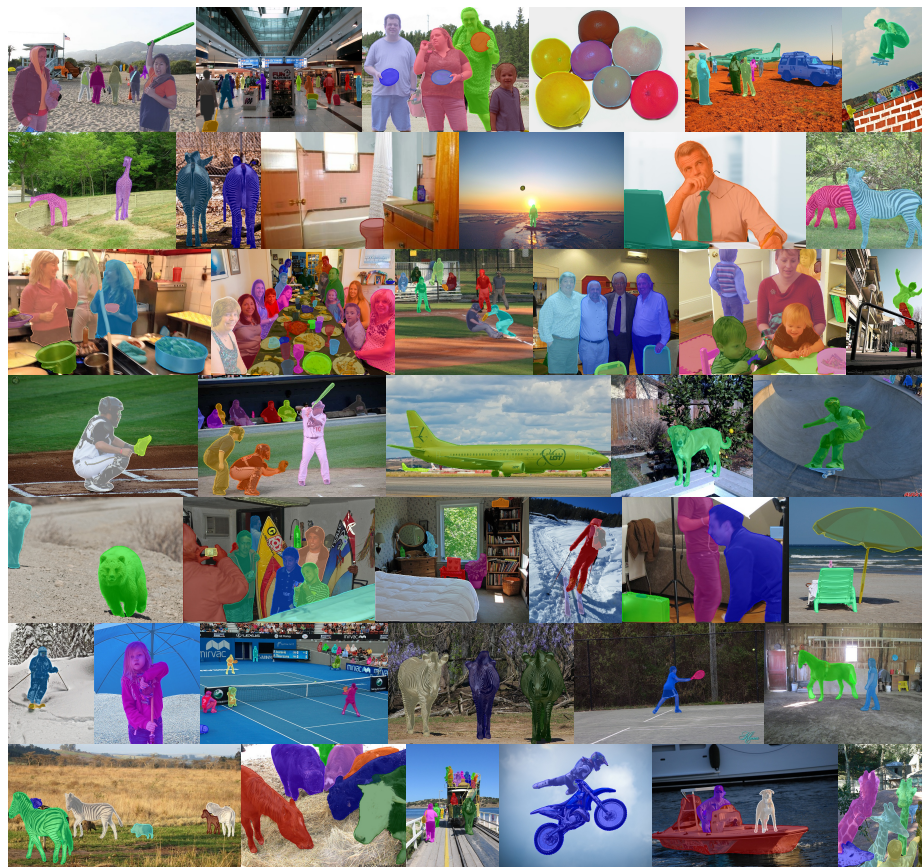

Fig. 1: More qualitative results of CondInst.
